# Supplementary material for: Unique Haploinsufficient Role of the MicroRNA-Processing Molecule Dicer1 in a Murine Colitis-Associated Tumorigenesis Model
Source: PubMed Central journal article supplement (PMC3759383; doi:10.1371/journal.pone.0071969), 2013-09-02

# Supplementary Figure 3

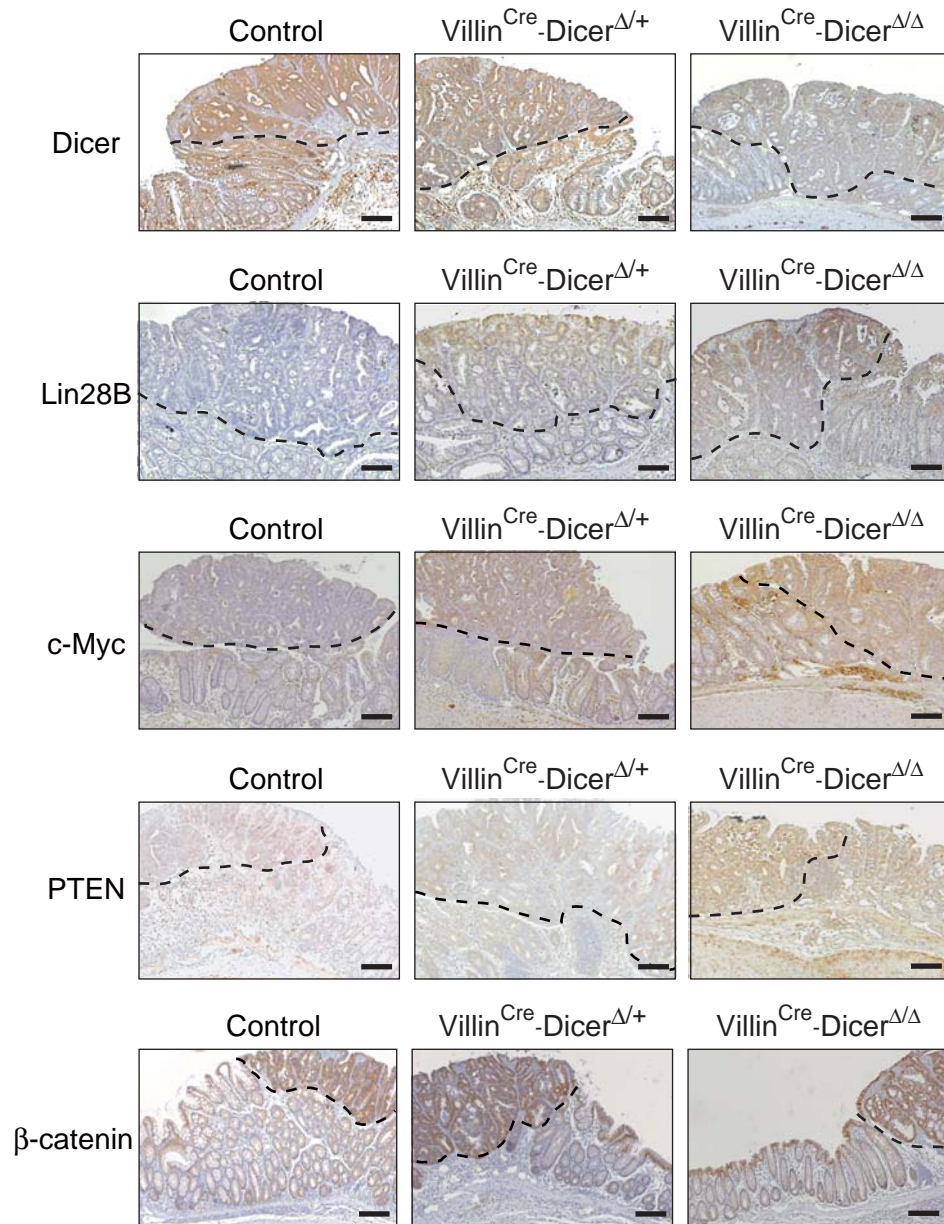

Supplement: pone.0071969.s003.pdf [file pone.0071969.s003.pdf]
